# Supplementary material for: The Effect of Timing of Exercise and Eating on Postprandial Response in Adults: A Systematic Review
Source: PubMed Central journal article supplement (PMC7019516; doi:10.3390/nu12010221), 2020-01-15
Supplement: nutrients-12-00221-s001.pdf [file nutrients-12-00221-s001.pdf]

**Table S1. Search Strategy:**

| <b>Initial search strategy executed March – May 2019</b> |                                                                                                                                                                                                                                                                                                                                                                                               |                          |
|----------------------------------------------------------|-----------------------------------------------------------------------------------------------------------------------------------------------------------------------------------------------------------------------------------------------------------------------------------------------------------------------------------------------------------------------------------------------|--------------------------|
| <b>Database</b>                                          | <b>Search Strategy</b>                                                                                                                                                                                                                                                                                                                                                                        | <b>Number of results</b> |
| <b>Medline PubMed</b>                                    | ("Adult"[Mesh]) AND (Meal Timing[tiab] OR eating time[tiab] OR ingestive behavior[tiab] OR time of eating[tiab] OR eating patterns[tiab] OR feeding behavior[MESH] OR "Exercise"[Mesh] OR exercise time[tiab] OR pre-prandial exercise[tiab] OR postprandial exercise[tiab]) AND Humans AND (obesity[tiab] OR overweight[tiab] OR obesity[mesh] OR diabetes[tiab] OR Diabetes Mellitus[mesh]) | 26,401                   |
| <b>SPORTDiscus</b>                                       | (adult AND (eating AND behavior OR feeding AND behavior OR meal AND timing OR eating AND patterns OR exercise AND time) AND humans AND (obesity OR overweight OR diabetes))                                                                                                                                                                                                                   | 113                      |
| <b>CINAHL</b>                                            | Adult AND (eating behavior OR feeding behavior OR ingestive behavior OR meal timing OR eating patterns OR eating time OR exercise time or pre-prandial exercise or post-postprandial exercise or exercise OR time of eating) AND humans AND (obesity or overweight or diabetes or diabetes mellitus)                                                                                          | 4,206                    |
| <b>Cochrane Library Database of Systematic Reviews</b>   | Adult AND (eating behavior OR feeding behavior OR ingestive behavior OR meal timing OR eating patterns OR eating time OR exercise time OR pre-prandial exercise OR post-prandial exercise OR exercise OR time of eating) AND humans AND (obesity or overweight or diabetes or diabetes mellitus)                                                                                              | 42                       |
| <b>Scopus</b>                                            | (adult AND (eating AND behavior OR feeding AND behavior OR meal AND timing OR eating AND patterns OR exercise AND time) AND humans AND (obesity OR overweight OR diabetes))                                                                                                                                                                                                                   | 277                      |
| <b>Google Scholar</b>                                    | (adult AND (eating AND behavior OR feeding AND behavior OR meal AND timing OR eating AND patterns OR exercise AND time) AND humans AND (obesity OR overweight OR diabetes))                                                                                                                                                                                                                   | 12                       |

Total results= 31,051

Number of duplicates removed= 937

Total number of studies screened: 30,114

Studies excluded for not meeting eligibility criteria: 30,095

Studies included for full text assessment: 19

Studies included in review: 19

Table S1. Search Strategy Cont.

| Final search executed on November 17, 2019 for period May 21 - November 17 |                                                                                                                                                                                                                                                                                                                                                                                               |                   |
|----------------------------------------------------------------------------|-----------------------------------------------------------------------------------------------------------------------------------------------------------------------------------------------------------------------------------------------------------------------------------------------------------------------------------------------------------------------------------------------|-------------------|
| Database                                                                   | Search Strategy                                                                                                                                                                                                                                                                                                                                                                               | Number of results |
| Medline PubMed                                                             | ("Adult"[Mesh]) AND (Meal Timing[tiab] OR eating time[tiab] OR ingestive behavior[tiab] OR time of eating[tiab] OR eating patterns[tiab] OR feeding behavior[MESH] OR "Exercise"[Mesh] OR exercise time[tiab] OR pre-prandial exercise[tiab] OR postprandial exercise[tiab]) AND Humans AND (obesity[tiab] OR overweight[tiab] OR obesity[mesh] OR diabetes[tiab] OR Diabetes Mellitus[mesh]) | 135               |
| SPORTDiscus                                                                | (adult AND (eating AND behavior OR feeding AND behavior OR meal AND timing OR eating AND patterns OR exercise AND time) AND humans AND (obesity OR overweight OR diabetes))                                                                                                                                                                                                                   | 19                |
| CINAHL                                                                     | Adult AND (eating behavior OR feeding behavior OR ingestive behavior OR meal timing OR eating patterns OR eating time OR exercise time or pre-prandial exercise or post-postprandial exercise or exercise OR time of eating) AND humans AND (obesity or overweight or diabetes or diabetes mellitus)                                                                                          | 226               |
| Cochrane Library Database of Systematic Reviews                            | Adult AND (eating behavior OR feeding behavior OR ingestive behavior OR meal timing OR eating patterns OR eating time OR exercise time OR pre-prandial exercise OR post-prandial exercise OR exercise OR time of eating) AND humans AND (obesity or overweight or diabetes or diabetes mellitus)                                                                                              | 2                 |
| Scopus                                                                     | (adult AND (eating AND behavior OR feeding AND behavior OR meal AND timing OR eating AND patterns OR exercise AND time) AND humans AND (obesity OR overweight OR diabetes))                                                                                                                                                                                                                   | 50                |
| Google Scholar                                                             | (adult AND (eating AND behavior OR feeding AND behavior OR meal AND timing OR eating AND patterns OR exercise AND time) AND humans AND (obesity OR overweight OR diabetes))                                                                                                                                                                                                                   | 2                 |

Total number of studies screened = 434

Number of duplicates= 36

Total number of studies screened: 398

Studies excluded for not meeting eligibility criteria: 397

Studies included for full text assessment: 1

Studies included in review: 1
